# Supplementary material for: Incomplete cellular reprogramming of colorectal cancer cells elicits an epithelial/mesenchymal hybrid phenotype
Source: PubMed Central journal article supplement (PMC6052640; doi:10.1186/s12929-018-0461-1), 2018-07-19
Supplement: 12929_2018_461_MOESM1_ESM.pdf [file 12929_2018_461_MOESM1_ESM.pdf]

**Additional file 1: Table S1.** Primer sequences of germ-layer markers and pluripotency genes analyzed in RT-PCR or qRT-PCR

| <b>Genes</b>                                                         | <b>Primer Sequences (5'-3')</b>                                 | <b>Base pair size (bp)</b> |
|----------------------------------------------------------------------|-----------------------------------------------------------------|----------------------------|
| <b><u>Germ-layer markers</u></b>                                     |                                                                 |                            |
| CDX2                                                                 | F: AAAGGCTTGGCTGGTGTATG<br>R: GTCAGGCCTGGAGTCCAATA              | 66                         |
| GATA6                                                                | F: TCTACAGCAAGATGAACGGCCTCA<br>R: TCTGCGCCATAAGGTGGTAGTTGT      | 125                        |
| MSX1                                                                 | F: GAGTTCTCCAGCTCGCTCAG<br>R: TCTCCAGCTCTGCCTCTTGT              | 100                        |
| <b><u>Pluripotency transgenes (Takahashi and Yamanaka, 2006)</u></b> |                                                                 |                            |
| OCT4                                                                 | F: CCCAGGGCCCCATTTGGTACC                                        |                            |
| SOX2                                                                 | F: GGCACCCCTGGCATGGCTCTTGGCTC                                   |                            |
| KLF4                                                                 | F: ACGATCGTGGCCCCGAAAAGGACC                                     |                            |
| c-MYC                                                                | F: CAACAACCGAAAATGCACCAGCCCCAG                                  |                            |
| pMX-AS3200                                                           | R: TTATCGTCGACCACTGTGCTGCTG (for OSK)                           |                            |
| pMX-L3205                                                            | R: CCCTTTTCTGGAGACTAAATAAA (for M)                              |                            |
| <b><u>Pluripotency genes (endogenous)</u></b>                        |                                                                 |                            |
| OCT4                                                                 | F: GACAGGGGGAGGGGAGGAGCTAGG<br>R: CTTCCCTCCAACCAGTTGCCCAAAC     | 144                        |
| SOX2                                                                 | F: GGGAAATGGGAGGGGTGCAAAAGAGG<br>R: TTGCGTGAGTGTGGATGGGATTGGTG  | 151                        |
| KLF4                                                                 | F: ATTGGACCCGGTGTACATTC<br>R: AGCACGAACTTGCCCATC                | 72                         |
| c-MYC                                                                | F: GCGTCCTGGGAAGGGAGATCCGGAGC<br>R: TTGAGGGGCATCGTCGCGGGAGGCTG  | 328                        |
| NANOG                                                                | F: AGTCCCAAAGGCAAACAACCCACTTC<br>R: TGCTGGAGGCTGAGGTATTTCTGTCTC | 161                        |
| REX1                                                                 | F: TCTGAGTACATGACAGGCAAGAA<br>R: TCTGATAGGTCAATGCCAGGT          | 62                         |
| GAPDH                                                                | F: CAGAACATCATCCCTGCCTCTAG<br>R: TTGAAGTCAGAGGAGACCACCTG        | 251                        |

Primer sequences of miRNAs analyzed in qRT-PCR

| <b>miRNA</b> | <b>Accession</b> | <b>Forward primer sequence (5' – 3')</b>        |
|--------------|------------------|-------------------------------------------------|
| miR-362-5p   | MIMAT0000705     | GGAATCCTTGGAACCTAGGTGTGAGT                      |
| miR-500a-3p  | MIMAT0002871     | ATGCACCTGGGCAAGGATTCTG                          |
| miR-532-3p   | MIMAT0004780     | CCTCCACACCCAAGGCTTGCA                           |
| miR-125b-5p  | MIMAT0000423     | GGTCCCTGAGACCCTAACTTGTGA                        |
| miR-199a-3p  | MIMAT0000232     | GCGACAGTAGTCTGCACATTGGTTA                       |
| miR-150-3p   | MIMAT0004610     | CTGGTACAGGCCTGG GGGACA G                        |
| RNU6         | X07425           | F: CTCGCTTCGGCAGCACA<br>R: AACGCTTCACGAATTTGCGT |
