# Supplementary material for: Incomplete cellular reprogramming of colorectal cancer cells elicits an epithelial/mesenchymal hybrid phenotype
Source: PubMed Central journal article supplement (PMC6052640; doi:10.1186/s12929-018-0461-1), 2018-07-19
Supplement: 12929_2018_461_MOESM2_ESM.pdf [file 12929_2018_461_MOESM2_ESM.pdf]

**Additional file 2: Table S2.** Regulated expression of miRNAs known to modulate cellular reprogramming

| <b>miRNA</b> | <b>Family</b>  | <b>Log<sub>2</sub>(fold change)<br/>iPC vs CRC</b> | <b>Log<sub>2</sub>(fold change)<br/>iPC vs ESC</b> |
|--------------|----------------|----------------------------------------------------|----------------------------------------------------|
| Cluster I    |                |                                                    |                                                    |
| miR-130a-3p  | <i>mir-130</i> | 4.6461377                                          | -5.80656                                           |
| miR-302a-3p  | <i>mir-302</i> | -0.8402815                                         | -13.211192                                         |
| miR-302a-5p  |                | -0.8402815                                         | -11.8833275                                        |
| miR-302b-3p  |                | -0.8402815                                         | -12.11458                                          |
| miR-302b-5p  |                | -0.8402815                                         | -6.5738697                                         |
| miR-302c-3p  |                | -0.8402815                                         | -12.443087                                         |
| miR-302c-5p  |                | -0.8402815                                         | -7.6779056                                         |
| miR-302d-3p  |                | -0.8402815                                         | -11.94684                                          |
| miR-498      |                | <i>C19MC</i>                                       | -0.8402815                                         |
| miR-512-3p   | -0.8402815     |                                                    | -7.684702                                          |
| miR-512-5p   | -0.8402815     |                                                    | -5.0344677                                         |
| miR-515-3p   | -0.8402815     |                                                    | -4.8008533                                         |
| miR-515-5p   | -0.8402815     |                                                    | -6.094796                                          |
| miR-516b-5p  | -0.8402815     |                                                    | -5.8819146                                         |
| miR-518b     | -0.8402815     |                                                    | -5.0204396                                         |
| miR-518c-5p  | -0.8402815     |                                                    | -4.878671                                          |
| miR-519b-3p  | -0.8402815     |                                                    | -6.20168                                           |
| miR-519c-3p  | -0.8402815     |                                                    | -4.9577136                                         |
| miR-519d-3p  | -0.8402815     |                                                    | -5.7168207                                         |
| miR-519e-5p  | -0.8402815     |                                                    | -4.8293204                                         |
| miR-520a-5p  | -0.8402815     |                                                    | -4.816074                                          |
| miR-520b     | -0.8402815     |                                                    | -4.5597577                                         |
| miR-520c-3p  | -0.8402815     |                                                    | -7.3049417                                         |
| miR-520f-3p  | -0.8402815     |                                                    | -5.131268                                          |
| miR-520g-3p  | -0.8402815     |                                                    | -5.0725846                                         |
| miR-520h     | -0.8402815     |                                                    | -3.9666684                                         |
| miR-525-5p   | -0.8402815     |                                                    | -6.0795727                                         |
| miR-526b-5p  | -0.8402815     |                                                    | -4.980953                                          |
| Cluster II   |                |                                                    |                                                    |
| miR-642a-3p  | <i>mir-642</i> | 0.71249723                                         | -1.4479289                                         |
| miR-3162-5p  | NA             | 0.50024843                                         | -1.0586226                                         |

| Cluster III |                |              |           |
|-------------|----------------|--------------|-----------|
| let-7a-5p   | <i>let 7</i>   | 0.316        | 5.9331636 |
| let-7b-5p   |                | 0.159        | 6.4127464 |
| let-7c-5p   |                | 0.465        | 5.9936905 |
| let-7d-5p   |                | -0.442       | 5.295085  |
| let-7f-5p   |                | 0.0166       | 5.6159344 |
| let-7g-5p   |                | -0.269       | 6.2615    |
| let-7i-5p   |                | -0.487       | 2.7759283 |
| miR-181a-5p | <i>mir-181</i> | -0.6985439   | 6.718727  |
| miR-200a-3p | <i>mir-200</i> | -0.6929922   | 4.7573786 |
| miR-200b-3p |                | -0.8206234   | 4.6905313 |
| miR-200c-3p |                | -0.029519081 | 5.6546283 |

NA, not available.
