# Supplementary material for: Incomplete cellular reprogramming of colorectal cancer cells elicits an epithelial/mesenchymal hybrid phenotype
Source: PubMed Central journal article supplement (PMC6052640; doi:10.1186/s12929-018-0461-1), 2018-07-19
Supplement: 12929_2018_461_MOESM3_ESM.pdf [file 12929_2018_461_MOESM3_ESM.pdf]

**Additional file 3: Table S3.** Full list of 102 differentially expressed miRNAs in 4 iPCs vs 2 CRCs

| No.                                  | Systematic name <sup>a</sup> | mirBase accession no <sup>b</sup> | Chromosome <sup>c</sup> | miRNA family <sup>d</sup> | FC ([iPC] vs [CRC]) <sup>e</sup> | Log <sub>2</sub> FC ([iPC] vs [CRC]) <sup>f</sup> | P (Corr) <sup>g</sup> |
|--------------------------------------|------------------------------|-----------------------------------|-------------------------|---------------------------|----------------------------------|---------------------------------------------------|-----------------------|
| <b>A. Up-regulated miRNAs (n=52)</b> |                              |                                   |                         |                           |                                  |                                                   |                       |
| 1.                                   | hsa-miR-30a-5p               | MIMAT0000087                      | 6q13                    | mir-30                    | 15.365                           | 3.942                                             | 0.0004                |
| 2.                                   | <b>hsa-miR-125a-3p</b>       | <b>MIMAT0004602</b>               | <b>19q13.41</b>         | <b>mir-10</b>             | <b>118.546</b>                   | <b>6.889</b>                                      | <b>0.000004</b>       |
| 3.                                   | <b>hsa-miR-125b-5p</b>       | <b>MIMAT0000423</b>               | <b>11q24.1</b>          | <b>mir-10</b>             | <b>471.473</b>                   | <b>8.881</b>                                      | <b>0.000004</b>       |
| 4.                                   | hsa-miR-130a-3p              | MIMAT0000425                      | 11q12.1                 | mir-130                   | 25.04                            | 4.646                                             | 0.0001                |
| 5.                                   | hsa-miR-132-3p               | MIMAT0000426                      | 17p13.3                 | mir-132                   | 18.361                           | 4.199                                             | 0.0005                |
| 6.                                   | hsa-miR-135a-3p              | MIMAT0004595                      | 3p21.1                  | mir-135                   | 15.596                           | 3.963                                             | 0.0006                |
| 7.                                   | <b>hsa-miR-150-3p</b>        | <b>MIMAT0004610</b>               | <b>19q13.33</b>         | <b>mir-150</b>            | <b>57.917</b>                    | <b>5.856</b>                                      | <b>0.000004</b>       |
| 8.                                   | hsa-miR-152-3p               | MIMAT0000438                      | 17q21.32                | mir-148                   | 18.976                           | 4.246                                             | 0.0002                |
| 9.                                   | hsa-miR-195-5p               | MIMAT0000461                      | 17p13.1                 | mir-15                    | 15.519                           | 3.956                                             | 0.0004                |
| 10.                                  | <b>hsa-miR-199a-3p</b>       | <b>MIMAT0000232</b>               | <b>19p13.2</b>          | <b>mir-199</b>            | <b>131.654</b>                   | <b>7.041</b>                                      | <b>0.000004</b>       |
| 11.                                  | hsa-miR-199a-5p              | MIMAT0000231                      | 19p13.2                 | mir-199                   | 33.402                           | 5.062                                             | 0.00003               |
| 12.                                  | hsa-miR-210-3p               | MIMAT0000267                      | 11p15.5                 | mir-210                   | 12.527                           | 3.647                                             | 0.01                  |
| 13.                                  | hsa-miR-371a-5p              | MIMAT0004687                      | 19q13.42                | mir-290                   | 18.086                           | 4.177                                             | 0.0057                |
| 14.                                  | hsa-miR-513b-5p              | MIMAT0005788                      | Xq27.3                  | mir-506                   | 10.414                           | 3.38                                              | 0.0032                |
| 15.                                  | hsa-miR-652-5p               | MIMAT0022709                      | Xq23                    | mir-652                   | 17.731                           | 4.148                                             | 0.0002                |
| 16.                                  | hsa-miR-671-5p               | MIMAT0003880                      | 7q36.1                  | mir-671                   | 36.821                           | 5.202                                             | 0.00002               |
| 17.                                  | hsa-miR-769-5p               | MIMAT0003886                      | 19q13.32                | mir-769                   | 32.424                           | 5.019                                             | 0.0001                |
| 18.                                  | <b>hsa-miR-1181</b>          | <b>MIMAT0005826</b>               | <b>19</b>               | <b>mir-1181</b>           | <b>50.918</b>                    | <b>5.67</b>                                       | <b>0.00001</b>        |
| 19.                                  | hsa-miR-1185-1-3p            | MIMAT0022838                      | 14                      | mir-154                   | 8.838                            | 3.144                                             | 0.0072                |
| 20.                                  | hsa-miR-1228-3p              | MIMAT0005583                      | 12                      | mir-1228                  | 26.819                           | 4.745                                             | 0.00004               |
| 21.                                  | hsa-miR-1249-3p              | MIMAT0005901                      | 22q13.31                | mir-1249                  | 7.521                            | 2.911                                             | 0.0134                |
| 22.                                  | hsa-miR-3188                 | MIMAT0015070                      | 19                      | mir-3188                  | 23.425                           | 4.55                                              | 0.0001                |
| 23.                                  | hsa-miR-3911                 | MIMAT0018185                      | 9                       | -                         | 6.24                             | 2.641                                             | 0.0415                |
| 24.                                  | <b>hsa-miR-3934-5p</b>       | <b>MIMAT0018349</b>               | <b>6</b>                | <b>mir-3934</b>           | <b>52.355</b>                    | <b>5.71</b>                                       | <b>0.0006</b>         |
| 25.                                  | <b>hsa-miR-4417</b>          | <b>MIMAT0018929</b>               | <b>1</b>                | <b>-</b>                  | <b>74.244</b>                    | <b>6.214</b>                                      | <b>0.000002</b>       |
| 26.                                  | hsa-miR-4463                 | MIMAT0018987                      | 6                       | -                         | 10.547                           | 3.399                                             | 0.0066                |
| 27.                                  | hsa-miR-4487                 | MIMAT0019021                      | 11                      | -                         | 17.222                           | 4.106                                             | 0.0003                |
| 28.                                  | hsa-miR-4488                 | MIMAT0019022                      | 11                      | mir-4488                  | 30.072                           | 4.91                                              | 0.00004               |
| 29.                                  | hsa-miR-4532                 | MIMAT0019071                      | 20                      | -                         | 11.062                           | 3.468                                             | 0.0032                |
| 30.                                  | hsa-miR-4646-5p              | MIMAT0019707                      | 6                       | -                         | 26.409                           | 4.723                                             | 0.0001                |
| 31.                                  | hsa-miR-4651                 | MIMAT0019715                      | 7                       | -                         | 31.011                           | 4.955                                             | 0.00004               |
| 32.                                  | hsa-miR-4655-5p              | MIMAT0019721                      | 7                       | -                         | 27.386                           | 4.775                                             | 0.0001                |
| 33.                                  | hsa-miR-4690-5p              | MIMAT0019779                      | 11                      | -                         | 15.437                           | 3.948                                             | 0.0004                |
| 34.                                  | hsa-miR-4695-5p              | MIMAT0019788                      | 1                       | -                         | 21.66                            | 4.437                                             | 0.0001                |
| 35.                                  | <b>hsa-miR-4734</b>          | <b>MIMAT0019859</b>               | <b>17</b>               | <b>-</b>                  | <b>82.13</b>                     | <b>6.36</b>                                       | <b>0.000002</b>       |
| 36.                                  | hsa-miR-4745-5p              | MIMAT0019878                      | 19                      | -                         | 48.841                           | 5.61                                              | 0.00001               |
| 37.                                  | hsa-miR-4746-3p              | MIMAT0019881                      | 19                      | -                         | 45.942                           | 5.522                                             | 0.00001               |
| 38.                                  | hsa-miR-4778-5p              | MIMAT0019936                      | 2                       | -                         | 22.567                           | 4.496                                             | 0.0001                |
| 39.                                  | hsa-miR-5194                 | MIMAT0021125                      | 8                       | -                         | 9.902                            | 3.308                                             | 0.0143                |
| 40.                                  | hsa-miR-5195-3p              | MIMAT0021127                      | 14                      | -                         | 15.349                           | 3.94                                              | 0.0468                |
| 41.                                  | hsa-miR-6075                 | MIMAT0023700                      | 5                       | -                         | 28.752                           | 4.846                                             | 0.00004               |
| 42.                                  | hsa-miR-6086                 | MIMAT0023711                      | X                       | -                         | 25.699                           | 4.684                                             | 0.0001                |
| 43.                                  | <b>hsa-miR-6723-5p</b>       | <b>MIMAT0025855</b>               | <b>1</b>                | <b>-</b>                  | <b>54.697</b>                    | <b>5.773</b>                                      | <b>0.00001</b>        |
| 44.                                  | hsa-miR-6752-5p              | MIMAT0027404                      | 11                      | -                         | 13.193                           | 3.722                                             | 0.035                 |
| 45.                                  | hsa-miR-6757-5p              | MIMAT0027414                      | 12                      | -                         | 35.174                           | 5.136                                             | 0.00004               |

|     |                        |                     |           |   |               |              |                 |
|-----|------------------------|---------------------|-----------|---|---------------|--------------|-----------------|
| 46. | hsa-miR-6778-5p        | MIMAT0027456        | 17        | - | 26.856        | 4.747        | 0.0001          |
| 47. | <b>hsa-miR-6789-5p</b> | <b>MIMAT0027478</b> | <b>19</b> | - | <b>75.413</b> | <b>6.237</b> | <b>0.000002</b> |
| 48. | hsa-miR-6798-5p        | MIMAT0027496        | 19        | - | 15.124        | 3.919        | 0.0004          |
| 49. | hsa-miR-6808-5p        | MIMAT0027516        | 1         | - | 26.666        | 4.737        | 0.0001          |
| 50. | hsa-miR-6867-5p        | MIMAT0027634        | 17        | - | 26.521        | 4.729        | 0.0001          |
| 51. | hsa-miR-7152-3p        | MIMAT0028215        | 10        | - | 29.631        | 4.889        | 0.0001          |
| 52. | hsa-miR-8089           | MIMAT0031016        | 5q35.3    | - | 12.588        | 3.654        | 0.0017          |

| No.                                   | Systematic name <sup>a</sup> | miRBase accession no <sup>b</sup> | Chromosome <sup>c</sup> | miRNA family <sup>d</sup> | FC ([iPC] vs [CRC]) <sup>e</sup> | Log <sub>2</sub> FC ([iPC] vs [CRC]) <sup>f</sup> | P (Corr) <sup>g</sup> |
|---------------------------------------|------------------------------|-----------------------------------|-------------------------|---------------------------|----------------------------------|---------------------------------------------------|-----------------------|
| <b>B. Down-regulated miRNA (n=50)</b> |                              |                                   |                         |                           |                                  |                                                   |                       |
| 1.                                    | hsa-miR-7-5p                 | MIMAT0000252                      | 15q26.1                 | mir-7                     | -6.103                           | -2.61                                             | 0.015                 |
| 2.                                    | hsa-miR-126-3p               | MIMAT0000445                      | 9q34.3                  | mir-126                   | -11.433                          | -3.515                                            | 0.006                 |
| 3.                                    | hsa-miR-149-5p               | MIMAT0000450                      | 2q37.3                  | mir-149                   | -10.262                          | -3.359                                            | 0.006                 |
| 4.                                    | hsa-miR-181c-5p              | MIMAT0000258                      | 19p13.13                | mir-181                   | -9.495                           | -3.247                                            | 0.007                 |
| 5.                                    | hsa-miR-183-3p               | MIMAT0004560                      | 7q32.2                  | mir-183                   | -6.82                            | -2.77                                             | 0.014                 |
| 6.                                    | hsa-miR-192-3p               | MIMAT0004543                      | 11q13.1                 | mir-192                   | -11.435                          | -3.515                                            | 0.006                 |
| 7.                                    | <b>hsa-miR-192-5p</b>        | <b>MIMAT0000222</b>               | <b>11q13.1</b>          | <b>mir-192</b>            | <b>-71.863</b>                   | <b>-6.167</b>                                     | <b>0.005</b>          |
| 8.                                    | hsa-miR-194-3p               | MIMAT0004671                      | 11q13.1                 | mir-194                   | -8.187                           | -3.033                                            | 0.009                 |
| 9.                                    | hsa-miR-200a-5p              | MIMAT0001620                      | 1p36.33                 | mir-8                     | -12.341                          | -3.625                                            | 0.006                 |
| 10.                                   | hsa-miR-335-3p               | MIMAT0004703                      | 7q32.2                  | mir-335                   | -6.084                           | -2.605                                            | 0.019                 |
| 11.                                   | <b>hsa-miR-338-3p</b>        | <b>MIMAT0000763</b>               | <b>17q25.3</b>          | <b>mir-338</b>            | <b>-28.578</b>                   | <b>-4.837</b>                                     | <b>0.004</b>          |
| 12.                                   | hsa-miR-345-5p               | MIMAT0000772                      | 14q32.2                 | mir-345                   | -6.706                           | -2.745                                            | 0.014                 |
| 13.                                   | hsa-miR-362-3p               | MIMAT0004683                      | Xp11.23                 | mir-362                   | -12.097                          | -3.597                                            | 0.006                 |
| 14.                                   | <b>hsa-miR-362-5p</b>        | <b>MIMAT0000705</b>               | <b>Xp11.23</b>          | <b>mir-362</b>            | <b>-21.331</b>                   | <b>-4.415</b>                                     | <b>0.005</b>          |
| 15.                                   | hsa-miR-421                  | MIMAT0003339                      | Xq13.2                  | mir-95                    | -9.459                           | -3.241                                            | 0.007                 |
| 16.                                   | hsa-miR-449b-3p              | MIMAT0009203                      | 5q11.2                  | mir-449                   | -10.501                          | -3.392                                            | 0.006                 |
| 17.                                   | hsa-miR-454-3p               | MIMAT0003885                      | 17q22                   | mir-454                   | -9.29                            | -3.216                                            | 0.007                 |
| 18.                                   | <b>hsa-miR-455-3p</b>        | <b>MIMAT0004784</b>               | <b>9q32</b>             | <b>mir-455</b>            | <b>-24.752</b>                   | <b>-4.629</b>                                     | <b>0.004</b>          |
| 19.                                   | hsa-miR-455-5p               | MIMAT0003150                      | 9q32                    | mir-455                   | -8.804                           | -3.138                                            | 0.008                 |
| 20.                                   | hsa-miR-500a-3p              | MIMAT0002871                      | Xp11.23                 | mir-500                   | -11.588                          | -3.535                                            | 0.006                 |
| 21.                                   | hsa-miR-500a-5p              | MIMAT0004773                      | Xp11.23                 | mir-500                   | -7.206                           | -2.849                                            | 0.012                 |
| 22.                                   | hsa-miR-505-3p               | MIMAT0002876                      | Xq27.1                  | mir-505                   | -10.101                          | -3.336                                            | 0.006                 |
| 23.                                   | hsa-miR-532-3p               | MIMAT0004780                      | Xp11.23                 | mir-188                   | -12.441                          | -3.637                                            | 0.006                 |
| 24.                                   | <b>hsa-miR-552-3p</b>        | <b>MIMAT0003215</b>               | <b>1p34.3</b>           | <b>mir-552</b>            | <b>-17.809</b>                   | <b>-4.154</b>                                     | <b>0.005</b>          |
| 25.                                   | hsa-miR-3200-3p              | MIMAT0015085                      | 22                      | mir-3200                  | -9.81                            | -3.294                                            | 0.007                 |
| 26.                                   | hsa-miR-3591-3p              | MIMAT0019877                      | 18                      | mir-122                   | -15.664                          | -3.969                                            | 0.005                 |
| 27.                                   | hsa-miR-3935                 | MIMAT0018350                      | 16                      | -                         | -12.456                          | -3.639                                            | 0.006                 |
| 28.                                   | hsa-miR-3940-3p              | MIMAT0018356                      | 19                      | mir-3940                  | -8.59                            | -3.103                                            | 0.008                 |
| 29.                                   | hsa-miR-3945                 | MIMAT0018361                      | 4                       | -                         | -11.84                           | -3.566                                            | 0.006                 |
| 30.                                   | <b>hsa-miR-4254</b>          | <b>MIMAT0016884</b>               | <b>1</b>                | -                         | <b>-16.253</b>                   | <b>-4.023</b>                                     | <b>0.005</b>          |
| 31.                                   | hsa-miR-4259                 | MIMAT0016880                      | 1                       | -                         | -8.351                           | -3.062                                            | 0.008                 |
| 32.                                   | hsa-miR-4323                 | MIMAT0016875                      | 19                      | -                         | -8.903                           | -3.154                                            | 0.008                 |
| 33.                                   | hsa-miR-4652-3p              | MIMAT0019717                      | 7                       | -                         | -14.167                          | -3.824                                            | 0.005                 |
| 34.                                   | hsa-miR-4687-5p              | MIMAT0019774                      | 11                      | -                         | -12.193                          | -3.608                                            | 0.006                 |
| 35.                                   | <b>hsa-miR-4725-5p</b>       | <b>MIMAT0019843</b>               | <b>17</b>               | -                         | <b>-15.874</b>                   | <b>-3.989</b>                                     | <b>0.005</b>          |
| 36.                                   | hsa-miR-4769-3p              | MIMAT0019923                      | X                       | -                         | -8.859                           | -3.147                                            | 0.008                 |
| 37.                                   | hsa-miR-6129                 | MIMAT0024613                      | 17                      | mir-6129                  | -14.419                          | -3.85                                             | 0.005                 |

|     |                               |                            |                  |   |                       |                      |                     |
|-----|-------------------------------|----------------------------|------------------|---|-----------------------|----------------------|---------------------|
| 38. | hsa-miR-6730-3p               | MIMAT0027362               | 1                | - | -9.713                | -3.28                | 0.007               |
| 39. | hsa-miR-6730-5p               | MIMAT0027361               | 1                | - | -11.055               | -3.467               | 0.006               |
| 40. | hsa-miR-6736-3p               | MIMAT0027374               | 1                | - | -8.668                | -3.116               | 0.008               |
| 41. | hsa-miR-6737-3p               | MIMAT0027376               | 1                | - | -14.51                | -3.859               | 0.005               |
| 42. | <b><i>hsa-miR-6741-3p</i></b> | <b><i>MIMAT0027384</i></b> | <b><i>1</i></b>  | - | <b><i>-20.624</i></b> | <b><i>-4.366</i></b> | <b><i>0.005</i></b> |
| 43. | <b><i>hsa-miR-6743-3p</i></b> | <b><i>MIMAT0027388</i></b> | <b><i>11</i></b> | - | <b><i>-20.191</i></b> | <b><i>-4.336</i></b> | <b><i>0.005</i></b> |
| 44. | hsa-miR-6752-3p               | MIMAT0027405               | 11               | - | -13.38                | -3.742               | 0.005               |
| 45. | hsa-miR-6766-3p               | MIMAT0027433               | 15               | - | -13.332               | -3.737               | 0.005               |
| 46. | hsa-miR-6779-3p               | MIMAT0027459               | 17               | - | -6.66                 | -2.736               | 0.014               |
| 47. | <b><i>hsa-miR-6782-5p</i></b> | <b><i>MIMAT0027464</i></b> | <b><i>17</i></b> | - | <b><i>-16.587</i></b> | <b><i>-4.052</i></b> | <b><i>0.005</i></b> |
| 48. | hsa-miR-6785-3p               | MIMAT0027471               | 17               | - | -11.629               | -3.54                | 0.006               |
| 49. | hsa-miR-6797-3p               | MIMAT0027495               | 19               | - | -10.433               | -3.383               | 0.006               |
| 50. | hsa-miR-6803-3p               | MIMAT0027507               | 19               | - | -11.134               | -3.477               | 0.006               |

miRNAs are arranged according to numerical order. MiRNAs in bold and in italics are the top 10 up- or down-regulated miRNAs as shown in **Table 1**. MiRNAs boxed in green are predicted to target the EMT/MET genes as shown in **Table 2**. <sup>a</sup>Systematic name, <sup>b</sup>miRBase accession number and <sup>d</sup>miRNA family are taken from miRBase database; <sup>c</sup>Chromosome locations are taken from HUGO Gene Nomenclature Committee (HGNC); <sup>e</sup>FC: Fold change; <sup>f</sup>Log<sub>2</sub>(FC): Log<sub>2</sub>(Fold change); <sup>g</sup>P (Corr), corrected *p* value, cutoff at 0.05.
